# Supplementary material
Source: Elsevier journal article supplement (https://www.sciencedirect.com/science/article/pii/S166526812030185X)
Supplement: mmc1 [file S166526812030185X:mmc1.docx]

| **Supplementary Table 1.** **Baseline characteristics of ICU admitted patients (n=148)** | |
| --- | --- |
| Age (years) | 54 (41-63) |
| Female sex – *n. (%)* | 81 (55%) |
| Etiology – n. (%)  *HCV*  *Alcohol*  *AIH*  *PBC*  *NAFLD*  *Cryptogenic*  *Overlapping syndrome*  *Others* | 44 (29.8%)  20 (13.5%)  17(11.5%)  12 (8.1%)  11 (7.4%)  26 (17.6%)  6 (4.1%)  12 (8.1%) |
| Child-Pugh – no. (%)  *A*  *B*  *C* | 5 (3.4%)  42 (28.4%)  101 (68.2%) |
| MELD score  *≤15*  *>15* | 45 (30.4%)  103 (69.6%) |
| ACLF Grades  *Grade 1*  *Grade 2*  *Grade 3* | 25 (17%)  41 (28%)  82 (55%) |
| Precipitating events  Infection  GI bleeding  HE  Alcohol  Unknow | 86 (58.1%)  12 (8.1%)  4 (2.7%)  4 (2.7%)  42 (28.4%) |
| *The data is presented in frequency (n.) and percentage (%), median and interquartile range.* *Abbreviations.* *AIH (Autoimmune Hepatitis), PBC (Primary Biliary Cholangitis), NAFLD (non-alcoholic fatty liver disease), MELD (Model for End-stage Liver Disease), ACLF (Acute on chronic liver failure)*, *GI (Gastrointestinal), HE (Hepatic encephalopathy).* | |
